# Supplementary material
Source: publisher site journal article supplement (https://www.dovepress.com/article/387715)
Supplement: Supplementary file 1 [file get_supplementary_file.php]

**Combined Biomimetic MOF-RVG15 nanoformulation efficient over BBB for effective anti-glioblastoma in mice model**

Hao Wu1, 2, Yanhong Liu2, Liqing Chen2, Shuangqing Wang1, 2, Chao Liu2, Heming Zhao2, Mingji Jin 1, 2, Shuangyan Chang2, Xiuquan quan3, Minhu Cui3, Hongshuang Wan2, 3, Zhonggao Gao1, 2 *, Wei Huang2 *

1. Key Laboratory of Natural Medicines of the Changbai Mountain, Ministry of Education, College of Pharmacy, Yanbian University, Yanji, 133002, Jilin Province, China

2. State Key Laboratory of Bioactive Substance and Function of Natural Medicines, Department of Pharmaceutics, Institute of Materia Medica, Chinese Academy of Medical Sciences and Peking Union Medical College, Beijing 100050, China

3. Department of Gastroenterology, Yanbian University Hospital, Yanji 133000, Jilin Province, China

* Corresponding authors: Zhonggao Gao, zggao@imm.ac.cn, Tel.: +86 010 63028096. Wei Huang, huangwei@imm.ac.cn, Tel.: +86 010 63026505


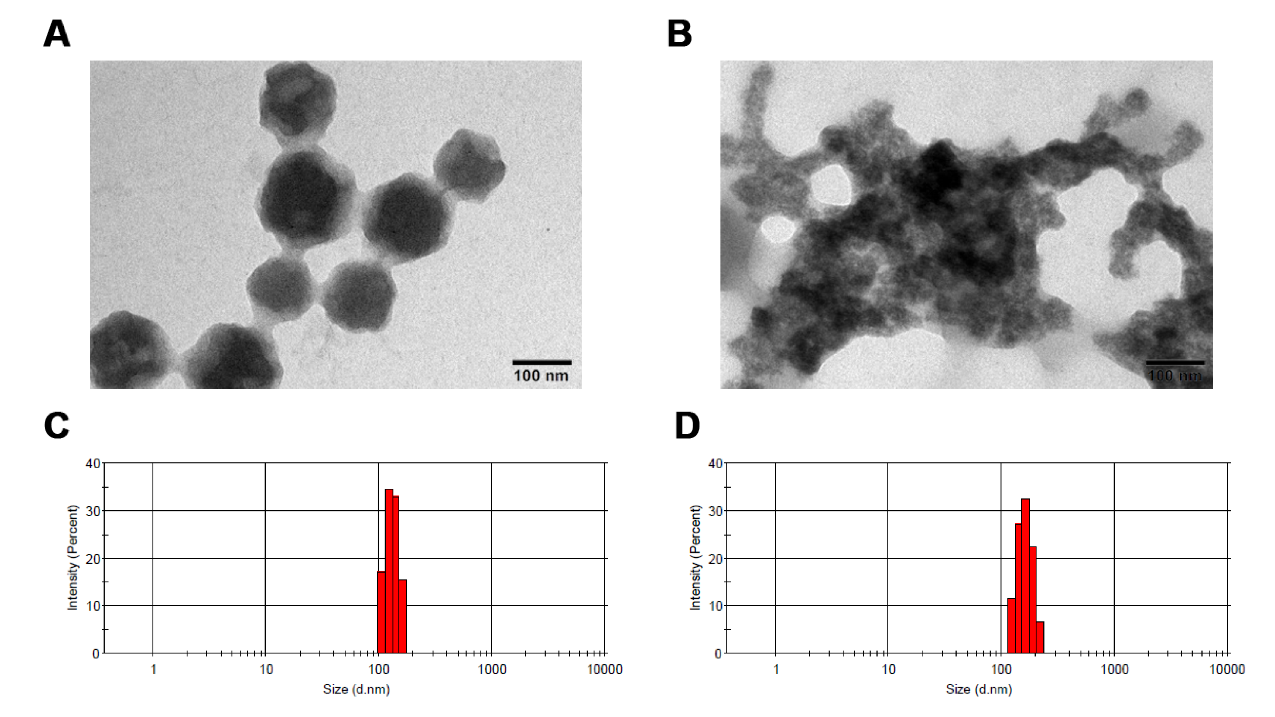


**Figure S1. (A)** RVG15-PEG@DTX@ZIF-8 incubated in PBS (pH 6.8) buffer for 24 h. **(B)** RVG15-PEG@DTX@ZIF-8 incubated in PBS (pH 5.5) buffer for 24 h. **(C)** Size distribution of RVG15-PEG@DTX@ZIF-8 after 24 h incubation in pH 6.8 PBS buffer. **(D)** Size distribution of RVG15-PEG@DTX@ZIF-8 after 24 h incubation in pH 5.5 PBS buffer.


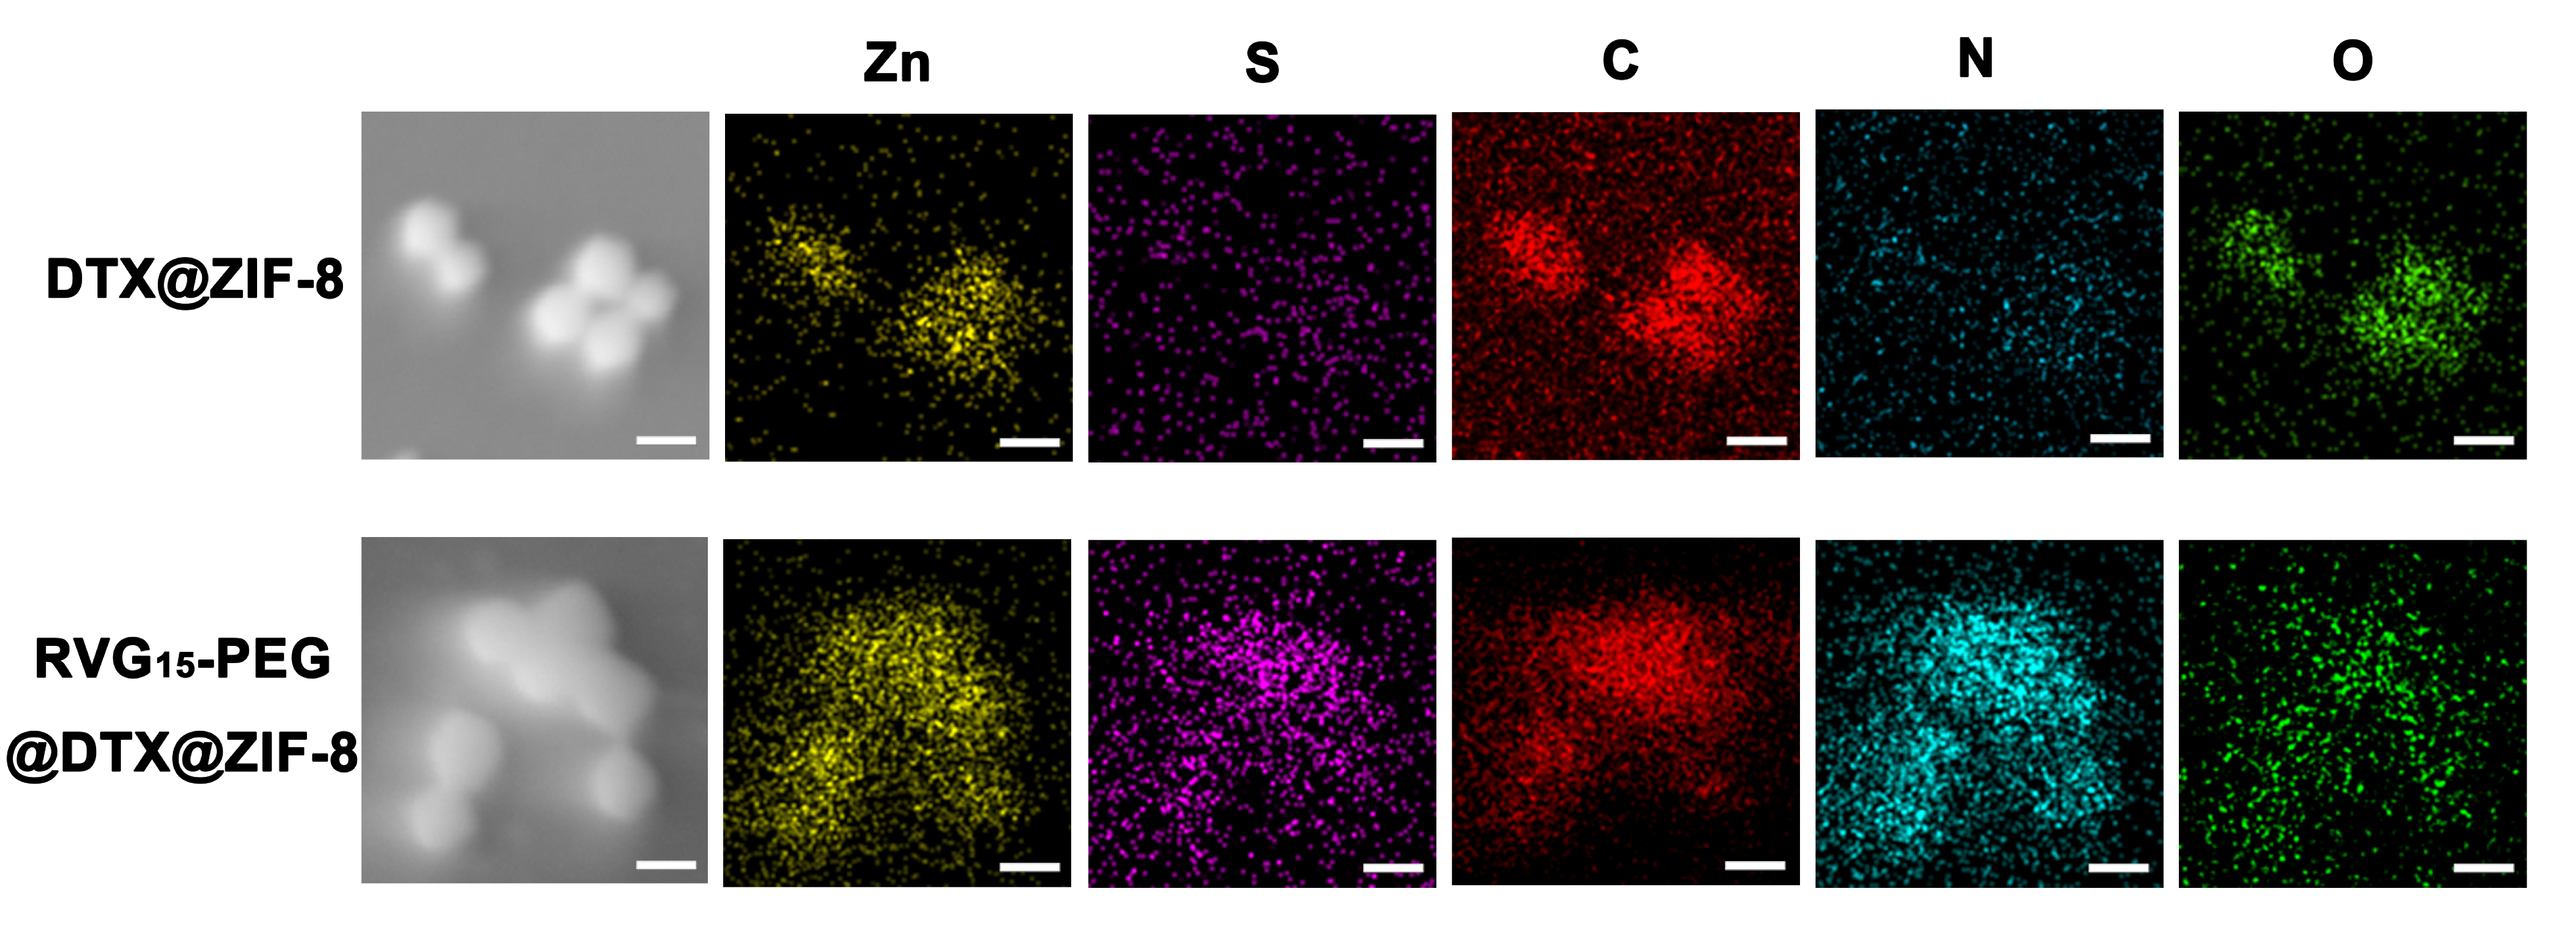


**Figure S2.** EDX of DTX@ZIF-8 and RVG15-PEG@DTX@ZIF-8. Scale bar = 100 μm.


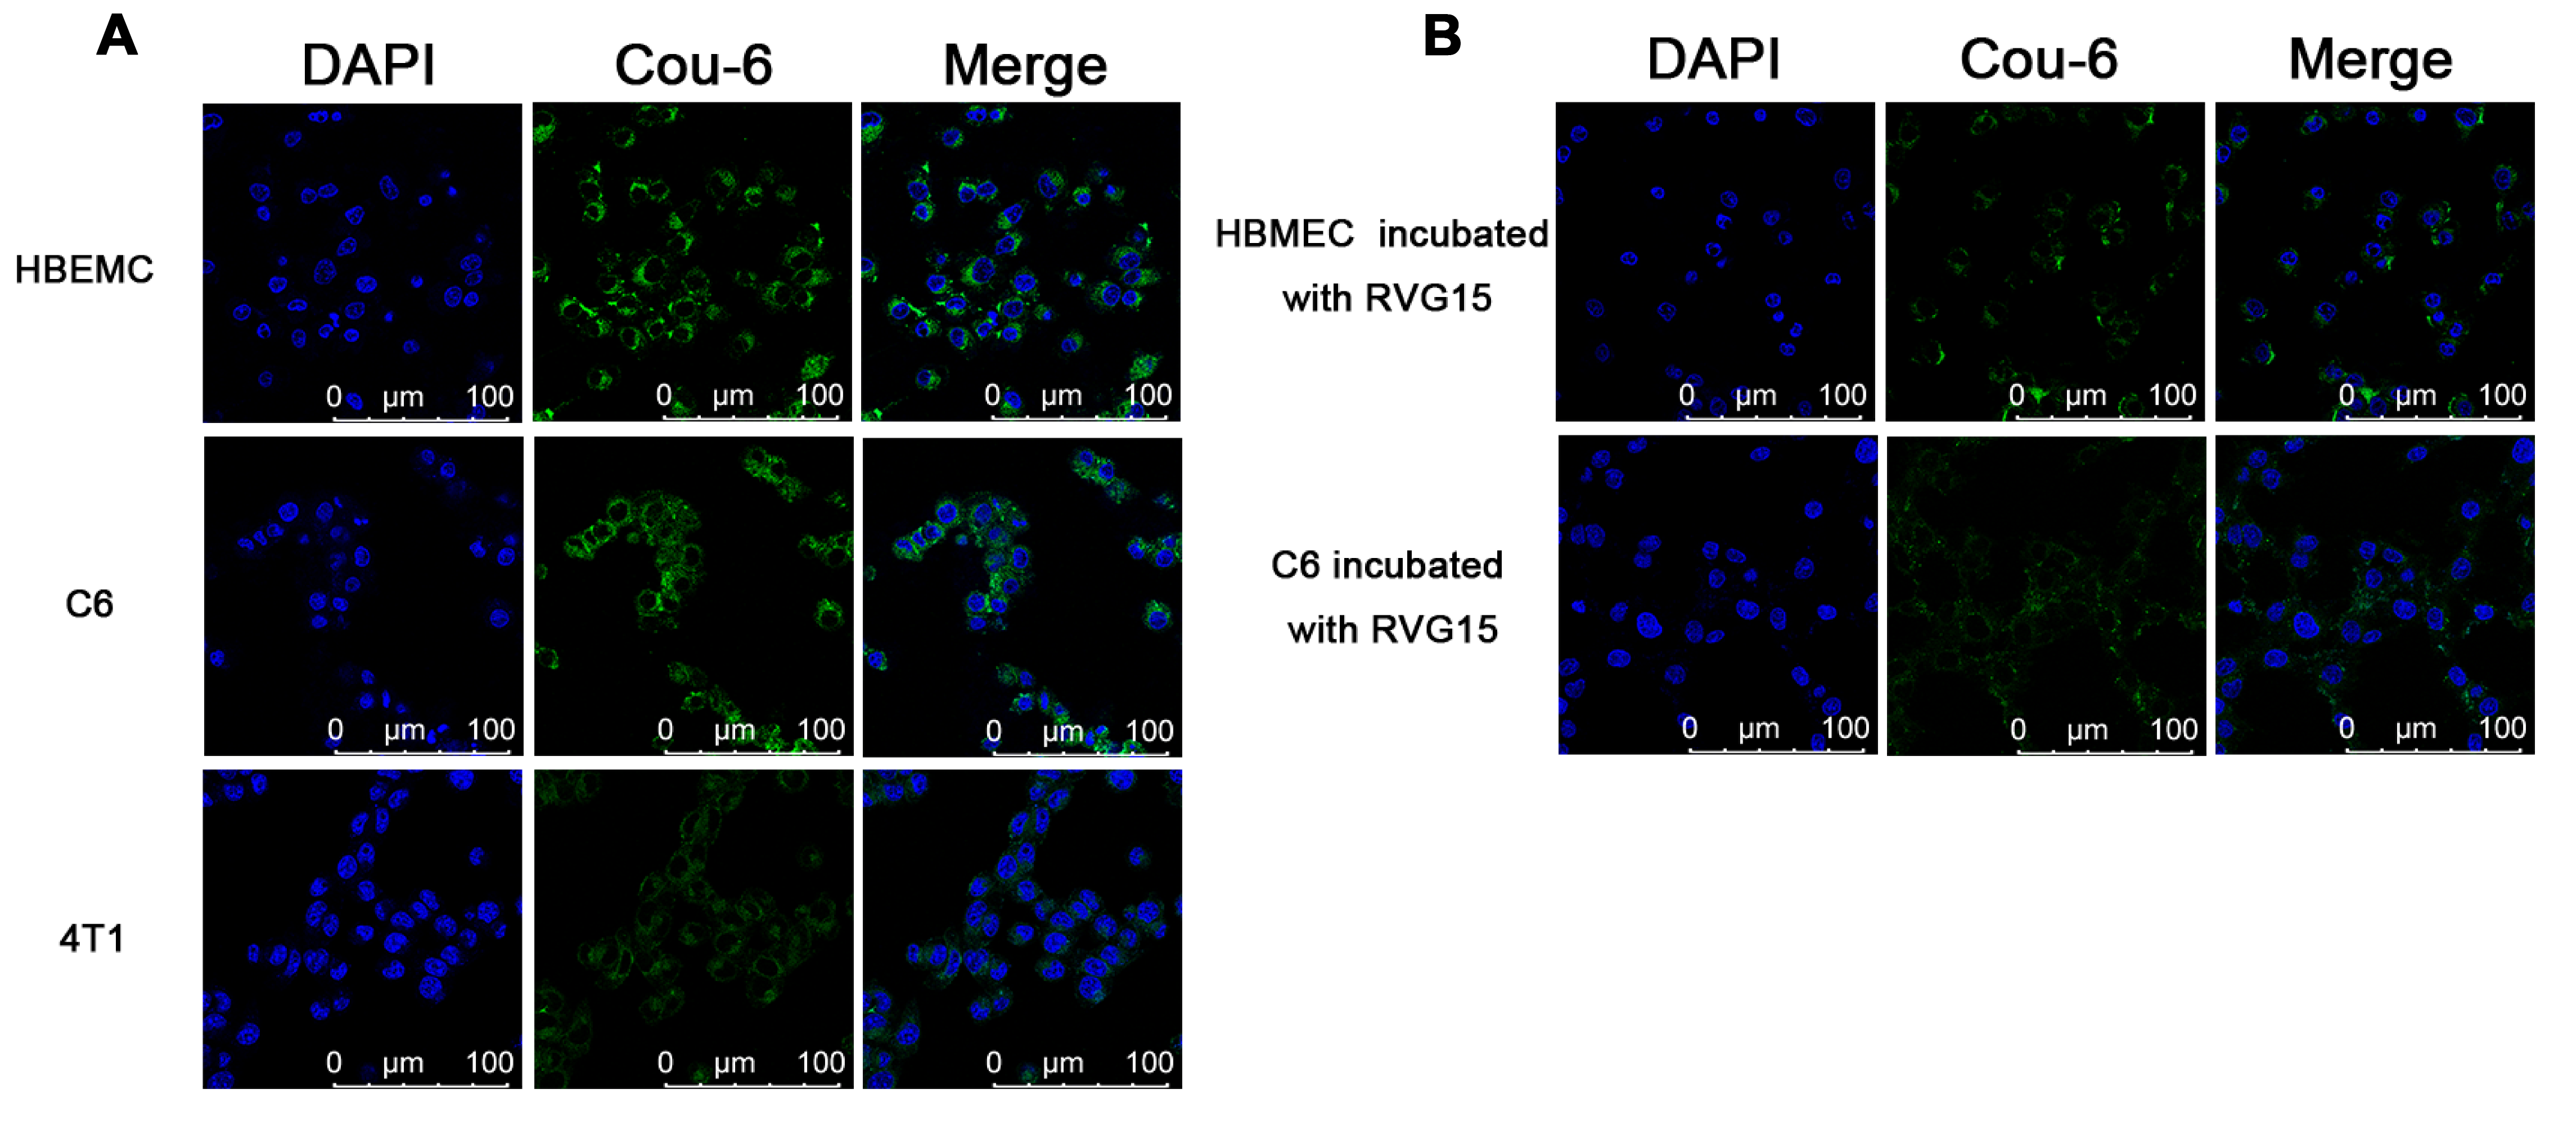


**Figure S3.** *In vitro* cellular uptake in HBMEC, C6 and 4T1 cells. **(A)** CLSM observation of HBMEC, C6 and 4T1 cells after treatment with RVG15-PEG@Cou-6@ZIF-8 for 240 min. **(B)** After incubation with an excess of RVG15, HBMEC and C6 cells were treated with RVG15-PEG@Cou-6@ZIF-8 for 240 min for CLSM observation.
